# Supplementary material for: Have Agricultural Land-Use Carbon Emissions in China Peaked? An Analysis Based on Decoupling Theory and Spatial EKC Model
Source: MDPI journal article supplement (doi:10.3390/land13050585), 2024-04-28
Supplement: s1 [file s1]

## Equations and coefficients for calculating agricultural carbon emissions

In this study, carbon emissions from agricultural production were predominantly derived from five sources. These were, agricultural materials, rice cultivation, soil management, and straw burning. The carbon effects of various activities in agricultural production and the data required for calculations were collated, as shown in Table S1.

**Table S1** Carbon effects of agricultural production and data required for calculation

| Source                 | Cause                                                                                                                                    | Factor     | Data required                                                                              | Reference                                            |
|------------------------|------------------------------------------------------------------------------------------------------------------------------------------|------------|--------------------------------------------------------------------------------------------|------------------------------------------------------|
| Agricultural materials | ①The production, transportation, and application of agricultural materials bring about carbon emissions.                                 | Fertilizer | Consumption of fertilizer                                                                  | Li et al., 2011                                      |
|                        |                                                                                                                                          | Pesticide  | Consumption of pesticide                                                                   |                                                      |
|                        |                                                                                                                                          | Mulch      | Consumption of mulch                                                                       |                                                      |
|                        | ②The consumption of diesel by machinery leads to carbon emissions.                                                                       | Diesel     | Consumption of diesel fuel in agriculture                                                  |                                                      |
|                        |                                                                                                                                          | Irrigation | Irrigated area                                                                             |                                                      |
|                        | ③The fossil fuels consumed for generating electricity in irrigation result in carbon emissions indirectly.                               |            |                                                                                            |                                                      |
| Rice cultivation       | Methanogens in rice fields utilize organic matter from the roots of rice plants to form CH <sub>4</sub> .                                | Rice field | Planting area of early rice, medium rice, late rice                                        | PRC National Development and Reform Commission, 2011 |
| Soil management        | N <sub>2</sub> O from cropland due to fertilizer nitrogen, straw return, atmospheric nitrogen deposition, runoff leaching nitrogen, etc. | Soil       | Application of nitrogen fertilizer and yields of various crops                             |                                                      |
| Straw burning          | Burning straw emits CO <sub>2</sub> , CH <sub>4</sub> , etc.                                                                             | Straw      | Yield of various crops, such as rice, wheat, maize, pulses, vegetables                     | Cheng et al., 2018                                   |
| Livestock breeding     | N <sub>2</sub> O and CH <sub>4</sub> emissions arise from livestock breeding from enteric fermentation and feces management.             | Livestock  | The number of cows, steer, buffalo, goats, sheep, horses, donkeys, mules, camels, and pigs |                                                      |

The total carbon emissions are the sum of the emissions from carbon sources, which is expressed as follows:

$$E = E_{\text{material}} + E_{\text{rice}} + E_{\text{soil}} + E_{\text{straw}} + E_{\text{livestock}}, \quad (1)$$

where  $E$  is the total agricultural carbon emissions,  $E_{\text{material}}$  is the carbon emissions from agricultural materials,  $E_{\text{rice}}$  is the carbon emissions from rice cultivation,  $E_{\text{soil}}$  is the carbon emissions from soil

management,  $E_{\text{straw}}$  is the carbon emissions from straw burning, and  $E_{\text{livestock}}$  is the carbon emissions from livestock breeding.  $\text{CH}_4$  and  $\text{N}_2\text{O}$  will be expressed in carbon equivalents (C-eq) according to global warmth potential, as the effect of 1 kg  $\text{CH}_4$  is equivalent to 9.2727 kg C-eq, and that of 1 kg  $\text{N}_2\text{O}$  is equivalent to 81.2727 kg C-eq (Cubasch et al., 2013).

## 1 Carbon emissions from agricultural materials

Carbon emissions from agricultural materials involve five factors, which are fertilizer, pesticides, mulch, diesel, and electricity used in irrigation, and is expressed as:

$$E_{\text{material}} = \sum_{i=1}^I \sum_{m=1}^M E_{im} = \sum_{i=1}^I \sum_{m=1}^M h_{im} \cdot \delta_m, \quad (2)$$

where  $E_{im}$  denotes the carbon emissions from factor  $m$  of province  $i$ ,  $h_{im}$  is the activity data of factor  $m$  of province  $i$ , and  $\delta_m$  is the carbon coefficient of factor  $m$ . The coefficients were obtained from Li et al. (2011), as shown in Table S2.

**Table S2** Specific factors and coefficients of carbon emissions from agricultural materials

| Agricultural material | Coefficient                     |
|-----------------------|---------------------------------|
| Fertilizer            | 0.8956 kg(C)·kg <sup>-1</sup>   |
| Pesticide             | 4.9341 kg(C)·kg <sup>-1</sup>   |
| Mulch                 | 5.1800 kg(C)·kg <sup>-1</sup>   |
| Diesel                | 0.5927 kg(C)·kg <sup>-1</sup>   |
| Irrigation            | 266.4800 kg(C)·hm <sup>-2</sup> |

## 2 CH<sub>4</sub> emissions from rice cultivation

The second carbon source was rice cultivation. The coefficients vary spatially, and provincial differences need to be considered, which is expressed as:

$$E_{\text{rice}} = \sum_{i=1}^I E_{\text{rice},i} = \sum_{i=1}^I q_i \cdot f_i, \quad (3)$$

where  $E_{\text{rice}}$  is the  $\text{CH}_4$  emissions from rice cultivation,  $E_{\text{rice},i}$  is the emissions of province  $i$ ,  $q_i$  is the rice planting area of province  $i$ , and  $f_i$  is the coefficient of  $\text{CH}_4$  from rice cultivation in province  $i$ , which is divided into three categories, namely, early-season rice, late-season rice, and mid-season rice. The coefficients were obtained from PRC National Development and Reform Commission (2011), as shown in

Table S3.

**Table S3** Coefficients of CH<sub>4</sub> emissions from rice fields in different provinces Unit: g·m<sup>-2</sup>

| Province          | Early-season<br>rice | Late-season<br>rice | Mid-season<br>rice | Province  | Early-season<br>rice | Late-season<br>rice | Mid-season<br>rice |
|-------------------|----------------------|---------------------|--------------------|-----------|----------------------|---------------------|--------------------|
| Beijing           | 0                    | 0                   | 13.23              | Henan     | 0                    | 0                   | 17.85              |
| Tianjin           | 0                    | 0                   | 11.34              | Hubei     | 17.51                | 39                  | 58.17              |
| Hebei             | 0                    | 0                   | 15.33              | Hunan     | 14.71                | 34.1                | 56.28              |
| Shanxi            | 0                    | 0                   | 6.62               | Guangdong | 15.05                | 51.6                | 57.02              |
| Inner<br>Mongolia | 0                    | 0                   | 8.93               | Guangxi   | 12.41                | 49.1                | 47.78              |
| Liaoning          | 0                    | 0                   | 9.24               | Hainan    | 13.43                | 49.4                | 52.29              |
| Jilin             | 0                    | 0                   | 5.57               | Chongqing | 6.55                 | 18.5                | 25.73              |
| Heilongjiang      | 0                    | 0                   | 8.31               | Sichuan   | 6.55                 | 18.5                | 25.73              |
| Shanghai          | 12.41                | 27.5                | 53.87              | Guizhou   | 5.1                  | 21                  | 22.05              |
| Jiangsu           | 16.07                | 27.6                | 53.55              | Yunnan    | 2.38                 | 7.6                 | 7.25               |
| Zhejiang          | 14.37                | 34.5                | 57.96              | Shaanxi   | 0                    | 0                   | 12.51              |
| Anhui             | 16.75                | 27.6                | 51.24              | Gansu     | 0                    | 0                   | 6.83               |
| Fujian            | 7.74                 | 52.6                | 43.47              | Qinghai   | 0                    | 0                   | 0                  |
| Jiangxi           | 15.47                | 45.8                | 65.42              | Ningxia   | 0                    | 0                   | 7                  |
| Shandong          | 0                    | 0                   | 21                 | Xinjiang  | 0                    | 0                   | 10                 |

### 3 N<sub>2</sub>O emissions from soil management

N<sub>2</sub>O emissions from soil management include both direct and indirect sources. Direct emissions are caused by in-season N input to agricultural land, including fertilizer, manure, and straw. In view of the difficulty in obtaining data on manure application, only fertilizer and straw were considered. Indirect emissions originate from atmospheric nitrogen deposition and nitrogen loss through leaching and runoff:

$$E_{\text{soil}} = E_{\text{sd}} + E_{\text{si}}, \quad (4)$$

where  $E_{\text{soil}}$  is the N<sub>2</sub>O emissions from soil management and  $E_{\text{sd}}$  and  $E_{\text{si}}$  are the direct and indirect N<sub>2</sub>O emissions, respectively.

#### 3.1 Direct N<sub>2</sub>O emissions from soil management

Nitrogen input from fertilizer and straw in croplands was considered. Measuring the direct emissions is expressed as:

$$E_{\text{sd}} = (N_{\text{fer}} + N_{\text{straw}}) \times ef_{\text{sd}}, \quad (5)$$

where  $N_{\text{fer}}$  is the quantity of nitrogen in the fertilizer,  $N_{\text{straw}}$  is the quantity of nitrogen in straw returned to the field, and  $ef_{\text{sd}}$  is the coefficient of direct  $\text{N}_2\text{O}$  emission, which is assigned according to PRC National Development and Reform Commission (2011), as shown in Table S4.

**Table S4** Coefficients of direct  $\text{N}_2\text{O}$  emission from soil management by province Unit:  $\text{kg}(\text{N}_2\text{O}) \cdot \text{kg}^{-1}$

| Province                                                                      | Recommended value | Range         |
|-------------------------------------------------------------------------------|-------------------|---------------|
| Xinjiang, Gansu, Inner Mongolia, Qinghai, Ningxia, Shaanxi, Shanxi            | 0.0056            | 0.0015–0.0085 |
| Heilongjiang, Jilin, Liaoning                                                 | 0.0114            | 0.0021–0.0258 |
| Beijing, Tianjin, Hebei, Henan, Shandong                                      | 0.0057            | 0.0014–0.0081 |
| Jiangsu, Shanghai, Zhejiang, Jiangxi, Anhui, Hubei, Hunan, Sichuan, Chongqing | 0.0109            | 0.0026–0.0220 |
| Fujian, Guangdong, Guangxi, Hainan                                            | 0.0178            | 0.0046–0.0228 |
| Guizhou, Yunnan                                                               | 0.0106            | 0.0025–0.0218 |

In Equation (5), the nitrogen input from straw is not available from statistical data, which needs to be calculated, and the expression is shown as Equation (6):

$$N_{\text{straw}} = \sum_{i=1}^I \sum_{k=1}^K N_{\text{straw},i,k} = \sum_{i=1}^I \sum_{k=1}^K \left( \left( \frac{Y_{ik}}{H_k} - Y_{ik} \right) \times r_k \times J_i \times b_k + \frac{Y_{ik}}{H_k} \times r_k \times g_k \times b_k \right), \quad (6)$$

where  $N_{\text{straw}}$  is the nitrogen from straw returned to the field,  $K$  is the number of crops. For crop  $k$  in province  $i$ ,  $N_{\text{straw},i,k}$  is the nitrogen from straw returned to the field,  $Y_{ik}$  is the economic yield.  $J_i$  is the rate of straw return in province  $i$ . For crop  $k$ ,  $H_k$  is the economic coefficient, which is the ratio of crop economic yield to biological yield,  $g_k$  is the root-to-crown ratio, and  $b_k$  is the dry weight ratio of the economic part. The coefficients were obtained from PRC National Development and Reform Commission (2011) and Cheng (2018), as shown in Table S5 and Table S6.

**Table S5** Coefficient for measuring nitrogen of straw returned to the field by crop

| Crop          | Dry weight ratio | Proportion of nitrogen in seeds | Proportion of nitrogen in straw | Economic coefficient | Root-to-crown ratio |
|---------------|------------------|---------------------------------|---------------------------------|----------------------|---------------------|
| Rice          | 0.855            | 0.01                            | 0.00753                         | 0.489                | 0.125               |
| Wheat         | 0.87             | 0.014                           | 0.00516                         | 0.434                | 0.166               |
| Maize         | 0.86             | 0.017                           | 0.0058                          | 0.438                | 0.17                |
| Sorghum       | 0.87             | 0.017                           | 0.0073                          | 0.393                | 0.185               |
| Grain         | 0.83             | 0.007                           | 0.0085                          | 0.385                | 0.166               |
| Other cereals | 0.83             | 0.014                           | 0.0056                          | 0.455                | 0.166               |
| Soybeans      | 0.86             | 0.06                            | 0.0181                          | 0.425                | 0.13                |

|              |      |         |         |       |      |
|--------------|------|---------|---------|-------|------|
| Other pulses | 0.82 | 0.05    | 0.022   | 0.385 | 0.13 |
| Rapeseed     | 0.82 | 0.00548 | 0.00548 | 0.271 | 0.15 |
| Peanuts      | 0.9  | 0.05    | 0.0182  | 0.556 | 0.2  |
| Seed cotton  | 0.83 | 0.00548 | 0.00548 | 0.383 | 0.2  |
| Potatoes     | 0.45 | 0.004   | 0.011   | 0.667 | 0.05 |
| Sesame       | 0.9  | 0.05    | 0.0131  | 0.417 | 0.2  |
| Hemp         | 0.83 | 0.0131  | 0.0131  | 0.83  | 0.2  |
| Sugar cane   | 0.32 | 0.004   | 0.0058  | 0.75  | 0.26 |
| Sugar beet   | 0.4  | 0.004   | 0.00507 | 0.667 | 0.05 |
| Vegetables   | 0.15 | 0.008   | 0.008   | 0.83  | 0.25 |
| Tobacco leaf | 0.83 | 0.041   | 0.0144  | 0.83  | 0.2  |

**Table S6** Straw return rates for major crops by province Unit: %

| Province       | Straw return rates | Province  | Straw return rates | Province  | Straw return rates |
|----------------|--------------------|-----------|--------------------|-----------|--------------------|
| Beijing        | 68.3               | Zhejiang  | 46.0               | Hainan    | 31.6               |
| Tianjin        | 43.3               | Anhui     | 19.2               | Chongqing | 24.2               |
| Hebei          | 65.1               | Fujian    | 39.2               | Sichuan   | 24.2               |
| Shanxi         | 42.9               | Jiangxi   | 46.9               | Guizhou   | 31.2               |
| Inner Mongolia | 18.5               | Shandong  | 56.0               | Yunnan    | 24.8               |
| Liaoning       | 3.4                | Henan     | 62.9               | Shaanxi   | 40.6               |
| Jilin          | 4.2                | Hubei     | 21.2               | Gansu     | 3.4                |
| Heilongjiang   | 7.0                | Hunan     | 45.6               | Qinghai   | 3.3                |
| Shanghai       | 29.6               | Guangdong | 29.0               | Ningxia   | 7.4                |
| Jiangsu        | 25.2               | Guangxi   | 53.2               | Xinjiang  | 27.6               |

### 3.2 Indirect N<sub>2</sub>O emissions from soil management

Indirect N<sub>2</sub>O emissions are caused by the volatilization of NO<sub>x</sub> and NH<sub>3</sub> from fertilized soils through atmospheric nitrogen deposition, and by soil nitrogen leaching or runoff losses into water bodies, which can be estimated by:

$$E_{si}=E_{sedi}+E_{leach} \\ =(N_{fer}+N_{straw}) \times V \times ef_{sedi} + (N_{fer}+N_{straw}) \times L \times ef_{leach} \quad (7)$$

where  $E_{atmos}$  indicates the N<sub>2</sub>O emissions caused by atmospheric nitrogen deposition and  $V$  and  $ef_{atmos}$  is the ratio of volatilization and the coefficient of emission, respectively, set as 10% and 0.01 kg(N<sub>2</sub>O)·kg<sup>-1</sup> recommended by the Intergovernmental Panel on Climate Change (IPCC) (IPCC, 2007).  $E_{leach}$  is the N<sub>2</sub>O emissions from soil nitrogen leaching and runoff losses,  $L$  is the rate of nitrogen loss, estimated as 20% of the total nitrogen input to the cropland, and  $ef_{leach}$  is the corresponding coefficient of emission, suggested

to be 0.0075 kg (N<sub>2</sub>O) ·kg<sup>-1</sup> by the IPCC.

#### 4 Carbon emissions from straw burning

Carbon emissions from straw burning are calculated by:

$$E_{\text{straw}} = \sum_{i=1}^I \sum_{k=1}^K E_{\text{straw},i,k} = \sum_{i=1}^I \sum_{k=1}^K (Y_{ik} \times s_k \times o_{ik} \times l_k \times ef_k), \quad (8)$$

In Equation (8), for crop  $k$ ,  $l_k$  is the burning efficiency,  $ef_k$  is the coefficient of emissions from straw burning, and  $s_k$  is the straw-to-grain ratio. For crop  $k$  in province  $i$ ,  $E_{\text{straw},i,k}$  is the emissions from straw burning,  $Y_{ik}$  is the economic yield,  $o_{ik}$  is the proportion of straw burning. All the coefficients were obtained from PRC National Development and Reform Commission (2011) and Cheng (2018), as shown in Table S7 to Table S9.

**Table S7** Straw-to-grain ratio of different crops by province

| Province                                                         | Rice | Wheat | Maize |
|------------------------------------------------------------------|------|-------|-------|
| Beijing, Tianjin, Hebei, Inner Mongolia, Shanxi, Shandong, Henan | 0.93 | 1.34  | 1.73  |
| Heilongjiang, Jilin, Liaoning                                    | 0.97 | 0.93  | 1.86  |
| Jiangsu, Shanghai, Zhejiang, Jiangxi, Anhui, Hubei, Hunan        | 1.28 | 1.38  | 2.05  |
| Shaanxi, Gansu, Ningxia, Qinghai, Xinjiang                       | 0.68 | 1.23  | 1.52  |
| Sichuan, Chongqing, Guizhou, Yunnan                              | 1.00 | 0.97  | 1.29  |
| Fujian, Guangdong, Guangxi, Hainan                               | 1.06 | 1.27  | 1.32  |

**Table S8** Proportion of straw burning by crop Unit: %

| Province       | Rice | Wheat | Maize | Province  | Rice | Wheat | Maize | Province  | Rice | Wheat | Maize |
|----------------|------|-------|-------|-----------|------|-------|-------|-----------|------|-------|-------|
| Beijing        | 0    | 3.1   | 12.1  | Zhejiang  | 25.9 | 31.4  | 33.7  | Hainan    | 34.8 | 0     | 31.1  |
| Tianjin        | 4.1  | 13.2  | 16    | Anhui     | 42.3 | 28.9  | 35.9  | Chongqing | 18.6 | 10.7  | 12.3  |
| Hebei          | 5.8  | 9.9   | 15.8  | Fujian    | 17.8 | 35.3  | 13.9  | Sichuan   | 25.6 | 16.2  | 28.8  |
| Shanxi         | 8.4  | 36    | 25.3  | Jiangxi   | 26.8 | 23.8  | 17.2  | Guizhou   | 3.4  | 4.6   | 4.3   |
| Inner Mongolia | 2.2  | 3.7   | 10.8  | Shandong  | 9.7  | 19.7  | 23.4  | Yunnan    | 36.8 | 33.2  | 23.1  |
| Liaoning       | 9.3  | 21.9  | 12.9  | Henan     | 19.7 | 34.8  | 19.3  | Shaanxi   | 6.2  | 13.4  | 22    |
| Jilin          | 18.1 | 12.7  | 13.5  | Hubei     | 19.1 | 27.8  | 21.6  | Gansu     | 8.5  | 6.7   | 15.1  |
| Heilongjiang   | 21.8 | 33.1  | 11.9  | Hunan     | 43.2 | 47.2  | 39.1  | Qinghai   | 0    | 8.1   | 6.5   |
| Shanghai       | 26.2 | 27.7  | 24.6  | Guangdong | 40.4 | 42.1  | 37.7  | Ningxia   | 19.7 | 20.3  | 18.2  |
| Jiangsu        | 34.6 | 27.3  | 23.3  | Guangxi   | 28.6 | 39.8  | 31.9  | Xinjiang  | 6.3  | 3.9   | 11.5  |

**Table S9** Burning efficiency and coefficient of carbon emission for straw open burning by crop

| Crop               | Rice | Wheat | Maize |
|--------------------|------|-------|-------|
| Burning efficiency | 0.93 | 0.93  | 0.92  |
| CH <sub>4</sub>    | 3.2  | 3.4   | 4.4   |

## 5 Carbon emissions from livestock breeding

N<sub>2</sub>O and CH<sub>4</sub> emissions arise from livestock breeding from enteric fermentation and feces management, which can be expressed by:

$$E_{\text{livestock}} = E_{\text{enteric}} + E_{\text{manure}}, \quad (9)$$

where  $E_{\text{livestock}}$  indicates the emissions caused by livestock breeding,  $E_{\text{enteric}}$  is the emissions of enteric fermentation, and  $E_{\text{manure}}$  is the emissions of feces management.

### 5.1 Carbon emissions from livestock breeding

Carbon emissions from livestock breeding can be calculated as:

$$E_{\text{enteric}} = \sum ef_{\text{enteric},p} \times AP_p, \quad (10)$$

where  $ef_{\text{enteric},p}$  is the coefficient of CH<sub>4</sub> emissions from enteric fermentation of animals  $p$ , and  $AP_p$  is the number of animals  $p$ . The coefficients were obtained from Cheng (2018), as shown in Table S10.

**Table S10** CH<sub>4</sub> emission coefficients in enteric fermentation of livestock Unit: kg·Capita<sup>-1</sup>

| Livestock    | Coefficient | Livestock | Coefficient | Livestock    | Coefficient |
|--------------|-------------|-----------|-------------|--------------|-------------|
| Cow          | 85          | Sheep     | 8.6         | /Donkey/Mule | 10          |
| Buffalo      | 88.5        | Goat      | 8.9         | Camel        | 46          |
| Other cattle | 71          | Horse     | 18          | Pig          | 1.5         |

### 5.2 Carbon emissions from enteric fermentation

Feces management can cause N<sub>2</sub>O and CH<sub>4</sub> emissions, which can be estimated as Equations (11) and (12).

$$E_{\text{manure, CH}_4} = \sum ef_{\text{manure, CH}_4,p} \times AP_p \quad (11)$$

$$E_{\text{manure, N}_2\text{O}} = \sum ef_{\text{manure, N}_2\text{O},p} \times AP_p \quad (12)$$

where  $E_{\text{manure, CH}_4}$  is the CH<sub>4</sub> emissions and  $E_{\text{manure, N}_2\text{O}}$  is the N<sub>2</sub>O emissions caused by enteric fermentation,  $ef_{\text{manure, CH}_4,p}$  and  $ef_{\text{manure, N}_2\text{O},p}$  denote the coefficient of CH<sub>4</sub> emissions and N<sub>2</sub>O emissions from manure management of animals  $p$ , respectively, and  $AP_p$  is the number of animals  $p$ . The coefficients were obtained

from Cheng (2018), as shown in Table S11 and Table S12.

**Table S11** CH<sub>4</sub> emission coefficients in manure management of livestock Unit: kg·Capita<sup>-1</sup>

| Province                                                      | Cow  | Other cattle | Sheep | Goat | Pig  | Poultry | Horse | Donkey/Mule | Camel |
|---------------------------------------------------------------|------|--------------|-------|------|------|---------|-------|-------------|-------|
| Beijing, Tianjin, Hebei, Shanxi, Inner Mongolia               | 7.46 | 2.82         | 0.15  | 0.17 | 3.12 | 0.01    | 1.09  | 0.6         | 1.28  |
| Heilongjiang, Jilin, Liaoning                                 | 2.23 | 1.02         | 0.15  | 0.16 | 1.12 | 0.01    | 1.09  | 0.6         | 1.28  |
| Shanghai, Jiangsu, Zhejiang, Anhui, Fujian, Jiangxi, Shandong | 8.33 | 3.31         | 0.26  | 0.28 | 5.08 | 0.02    | 1.64  | 0.9         | 1.92  |
| Henan, Hebei, Hunan, Guangdong, Guangxi, Hainan               | 8.45 | 4.72         | 0.34  | 0.31 | 5.85 | 0.02    | 1.64  | 0.9         | 1.92  |
| Chongqing, Sichuan, Guizhou, Yunnan                           | 6.51 | 3.21         | 0.48  | 0.53 | 4.18 | 0.02    | 1.64  | 0.9         | 1.92  |
| Shaanxi, Gansu, Qinghai, Ningxia, Xinjiang                    | 5.93 | 1.86         | 0.28  | 0.32 | 1.38 | 0.01    | 1.09  | 0.6         | 1.28  |

**Table S12** N<sub>2</sub>O emission coefficients in manure management of livestock Unit: kg·Capita<sup>-1</sup>

| Province                                                      | Cow   | Other cattle | Sheep | Goat  | Pig   | Poultry | Horse | Donkey/Mule | Camel |
|---------------------------------------------------------------|-------|--------------|-------|-------|-------|---------|-------|-------------|-------|
| Beijing, Tianjin, Hebei, Shanxi, Inner Mongolia               | 1.846 | 0.794        | 0.093 | 0.093 | 0.227 | 0.007   | 0.33  | 0.188       | 0.33  |
| Heilongjiang, Jilin, Liaoning                                 | 1.096 | 0.913        | 0.057 | 0.057 | 0.266 | 0.007   | 0.33  | 0.188       | 0.33  |
| Shanghai, Jiangsu, Zhejiang, Anhui, Fujian, Jiangxi, Shandong | 2.065 | 0.846        | 0.113 | 0.113 | 0.175 | 0.007   | 0.33  | 0.188       | 0.33  |
| Henan, Hebei, Hunan, Guangdong, Guangxi, Hainan               | 1.71  | 0.805        | 0.106 | 0.106 | 0.157 | 0.007   | 0.33  | 0.188       | 0.33  |
| Chongqing, Sichuan, Guizhou, Yunnan                           | 1.884 | 0.691        | 0.064 | 0.064 | 0.159 | 0.007   | 0.33  | 0.188       | 0.33  |
| Shaanxi, Gansu, Qinghai, Ningxia, Xinjiang                    | 1.447 | 0.545        | 0.074 | 0.074 | 0.195 | 0.007   | 0.33  | 0.188       | 0.33  |

## Reference

- [1] Cheng, L. L., 2018. Spatial and Temporal Differentiation of China's agricultural carbon productivity: mechanism and demonstration. Huazhong Agricultural University.
- [2] Cubasch, U. D., Wuebbles, D., Chen, D. L., Facchini, M. C., Frame, D., Mahowald, N., Winther, J. G., 2013. Climate Change 2013: The Physical Science Basis. Contribution of working group I to the fifth assessment report of the intergovernmental panel on climate change. Cambridge, United Kingdom and New York, USA: Cambridge University Press, 121–155.
- [3] IPCC (Intergovernmental Panel on Climate Change). 2007. Climate change 2007: the physical science basis: working group I contribution to the fourth assessment report of the intergovernmental panel on climate change. Cambridge University Press: New York, NY, USA.
- [4] Li, B., Zhang, J.B., Li, H.P., 2011. Research on spatial-temporal characteristics and affecting factors decomposition of agricultural carbon emission in China. *China Popul. Resour. Environ.* 21, 80–86.
- [5] PRC National Development and Reform Commission, 2011. Guidelines for the preparation of provincial greenhouse gas inventories (Trial). PRC National Development and Reform Commission: Beijing, China.
